# Supplementary material for: Hybrid Polyelectrolyte Capsules Loaded with Gadolinium-Doped Cerium Oxide Nanoparticles as a Biocompatible MRI Agent for Theranostic Applications
Source: MDPI journal article supplement (doi:10.3390/polym15183840), 2023-09-21
Supplement: s1 [file s1]

# Hybrid polyelectrolyte capsules loaded with gadolinium-doped cerium oxide nanoparticles as a biocompatible MRI agent for theranostic applications

Danil D. Kolmanovich<sup>1</sup>, Nikita N. Chukavin<sup>1</sup>, Irina V. Savintseva<sup>1</sup>, Elena A. Mysina<sup>1</sup>, Nelli R. Popova<sup>1</sup>, Alexander E. Baranchikov<sup>2\*</sup>, Madina M. Sozarukova<sup>2</sup>, Vladimir K. Ivanov<sup>2</sup> and Anton L. Popov<sup>1\*</sup>

<sup>1</sup>Institute of Theoretical and Experimental Biophysics, Russian Academy of Sciences, Pushchino 142290, Moscow Region, Russia

<sup>2</sup>Kurnakov Institute of General and Inorganic Chemistry of the Russian Academy of Sciences, Moscow 119991, Russia

\* Correspondence: a.baranchikov@yandex.ru (A.E.B.); antonpopovleonid@gmail.com (A.L.P.)

**Table S1.** The aggregative stability of CeGdO<sub>2-x</sub> NPs via DLS study in different medium

|                     | mQ    | PBS (pH 7.4) | NaCl 0.9% | DMEM/F12 | DMEM/F12+10%<br>FBS |
|---------------------|-------|--------------|-----------|----------|---------------------|
| Z-среднее<br>(d.nm) | 6.4   | 10.5         | 15.6      | 60.12    | 8.9                 |
| PDI                 | 0.231 | 0.366        | 0.433     | 0.372    | 0.323               |

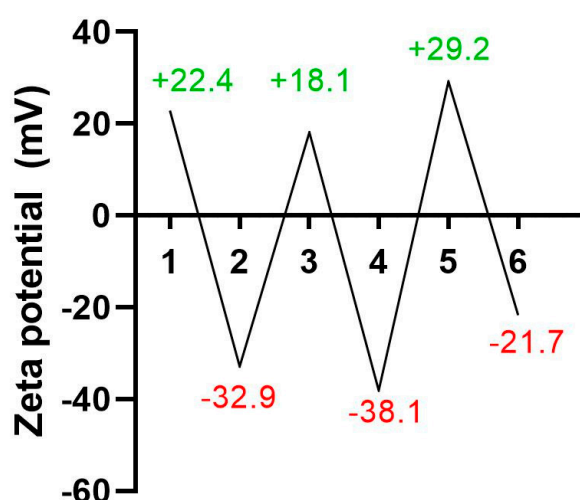

**Figure S1.** Changes in zeta potential of CeGdO<sub>2-x</sub> loaded capsules while layer by layer assembly. Layer 1<sup>st</sup>, 3<sup>rd</sup>, 5<sup>th</sup>: positively charge (poly-l- arginine). Layer 2<sup>nd</sup>, 4<sup>th</sup>, 6<sup>th</sup>: negatively charge (2<sup>nd</sup> and 6<sup>th</sup> dextran sulphate, 4<sup>th</sup> – citrate-stabilized CeGdO<sub>2-x</sub> NPs) applied on calcium carbonate template
